# Supplementary material for: Effects of activating agent and pyrolysis temperature on the pore structure and adsorption performance of sweet potato vine-based activated carbon
Source: Royal Society of Chemistry journal article supplement (doi:10.1039/d6ra01057a), 2026-04-07
Supplement: d6ra01057a1.pdf [file d6ra01057a1.pdf]

Supplementary Information

**Effects of activating agent and pyrolysis temperature on the pore structure and adsorption performance of sweet potato vine-based activated carbon**

Wei Wei\*, Na Ren

College of Biochemical Engineering, Beijing Union University, No. 18 Sanqu, Fatouxili, Chaoyang District, Beijing, 100023, China

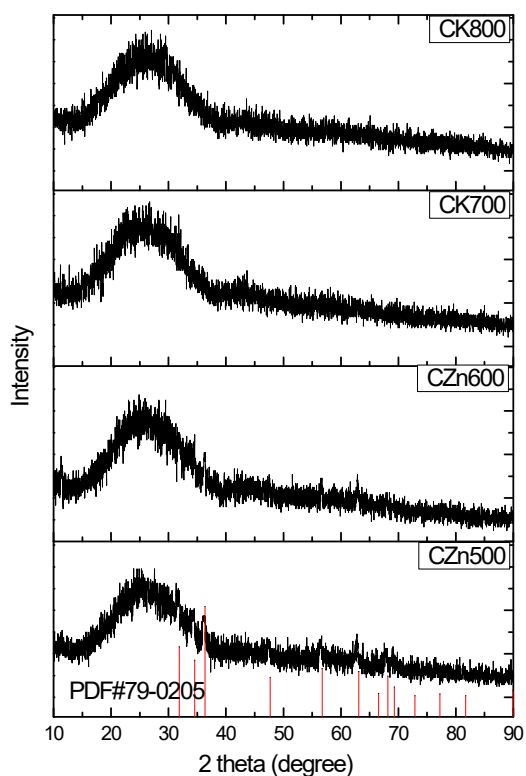

Figure S1 XRD spectra of the activated carbon

\* Corresponding author. Tel. & Fax.: 86 10 52072157 (W Wei), E-mail: wlweiwei@buu.edu.cn

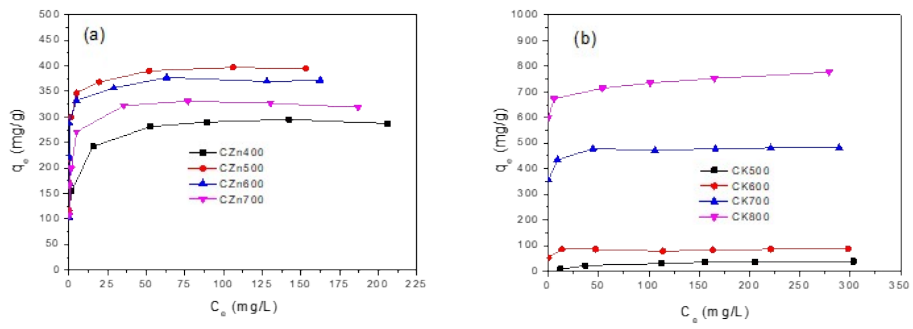

Figure S2. The adsorption capacities of different activated carbons for MB

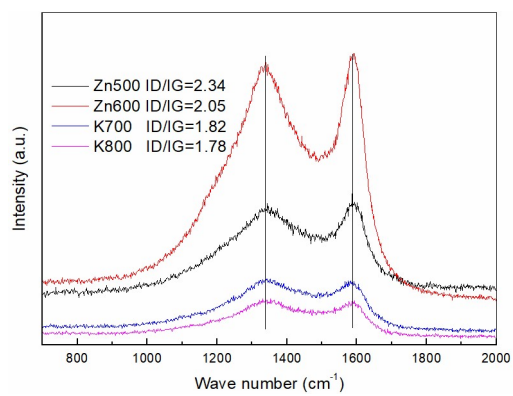

Figure S3 Raman spectra of activated carbon

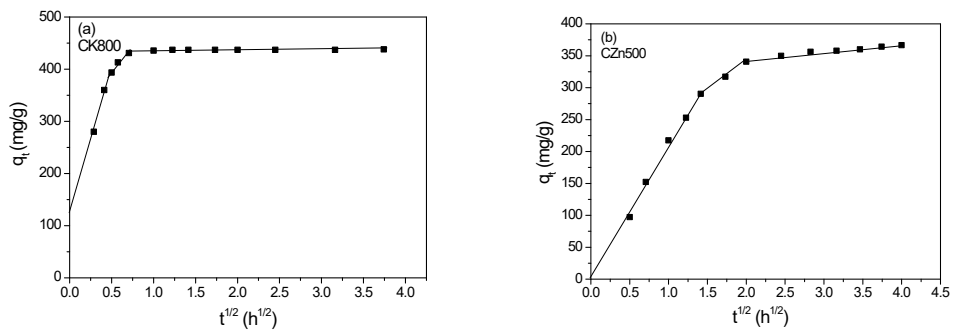

Figure S4. Fitting curves of Webber-Morris intra-particle diffusion model for MB

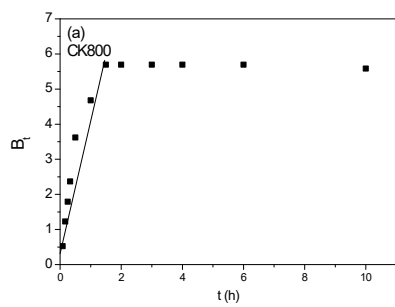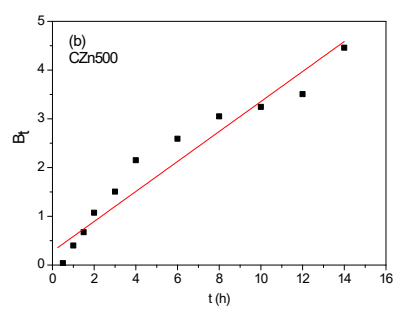

Figure S5. Boyd plots for the adsorption of MB
